# Supplementary material for: Noble Metal Nanoparticles Stabilized by Hyper-Cross-Linked Polystyrene as Effective Catalysts in Hydrogenation of Arenes
Source: MDPI journal article supplement (doi:10.3390/molecules26154687), 2021-08-03
Supplement: s1 [file s1]

## Supplementary Materials

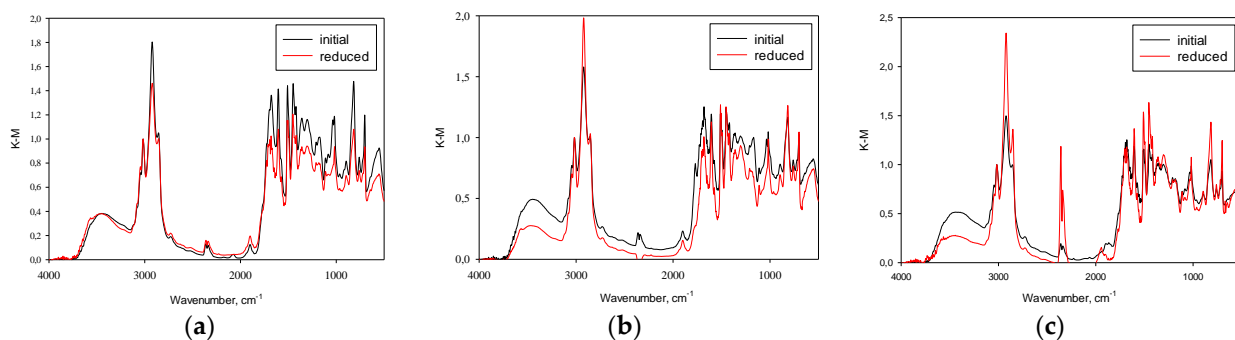

**Figure S1.** DRIFT spectra of 2%-Pt/HPS-NR<sub>2</sub> (a), 2%-Pd/HPS-NR<sub>2</sub> (b) and 2%-Ru/HPS-NR<sub>2</sub> (c): initial (black line) and after activation in hydrogen flow (red line).

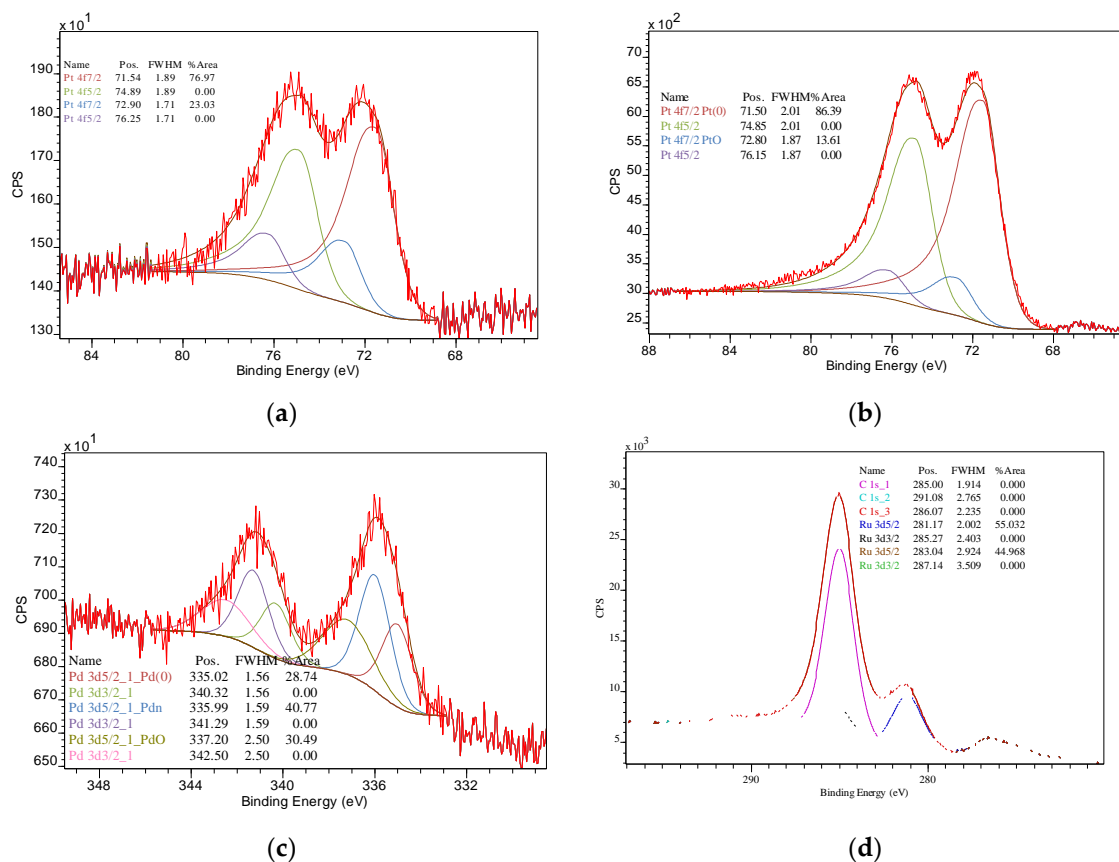

**Figure S2.** High-resolution XPS spectra of Pt 4f (a, b), Pd 3d (c) and Ru 3d (d) in the activated samples: 1%-Pt/HPS (a), 2%-Pt/HPS-NR<sub>2</sub> (b), 2%-Pd/HPS-NR<sub>2</sub> (c) and 2%-Ru/HPS-NR<sub>2</sub> (d).
